# Supplementary material for: Immune-related gene expression in skin, inflamed and keloid tissue from patients with keloids
Source: PubMed Central journal article supplement — Oncol Lett. 2022 Jan 5;23(2):72. doi: 10.3892/ol.2022.13192 (PMC8756427; doi:10.3892/ol.2022.13192), 2022-01-05

Figure S1. (A) K8: Inflamed tissue sample was obtained from inflamed skin tissue following the acute stage of a keloid patient with an inflamed lesion (green arrow). The green circle is group I. The red circle is group N. The blue circle is group K. (B-I) K7, K9, K14, K36, K1, K2, K3, and K4 samples of patients.

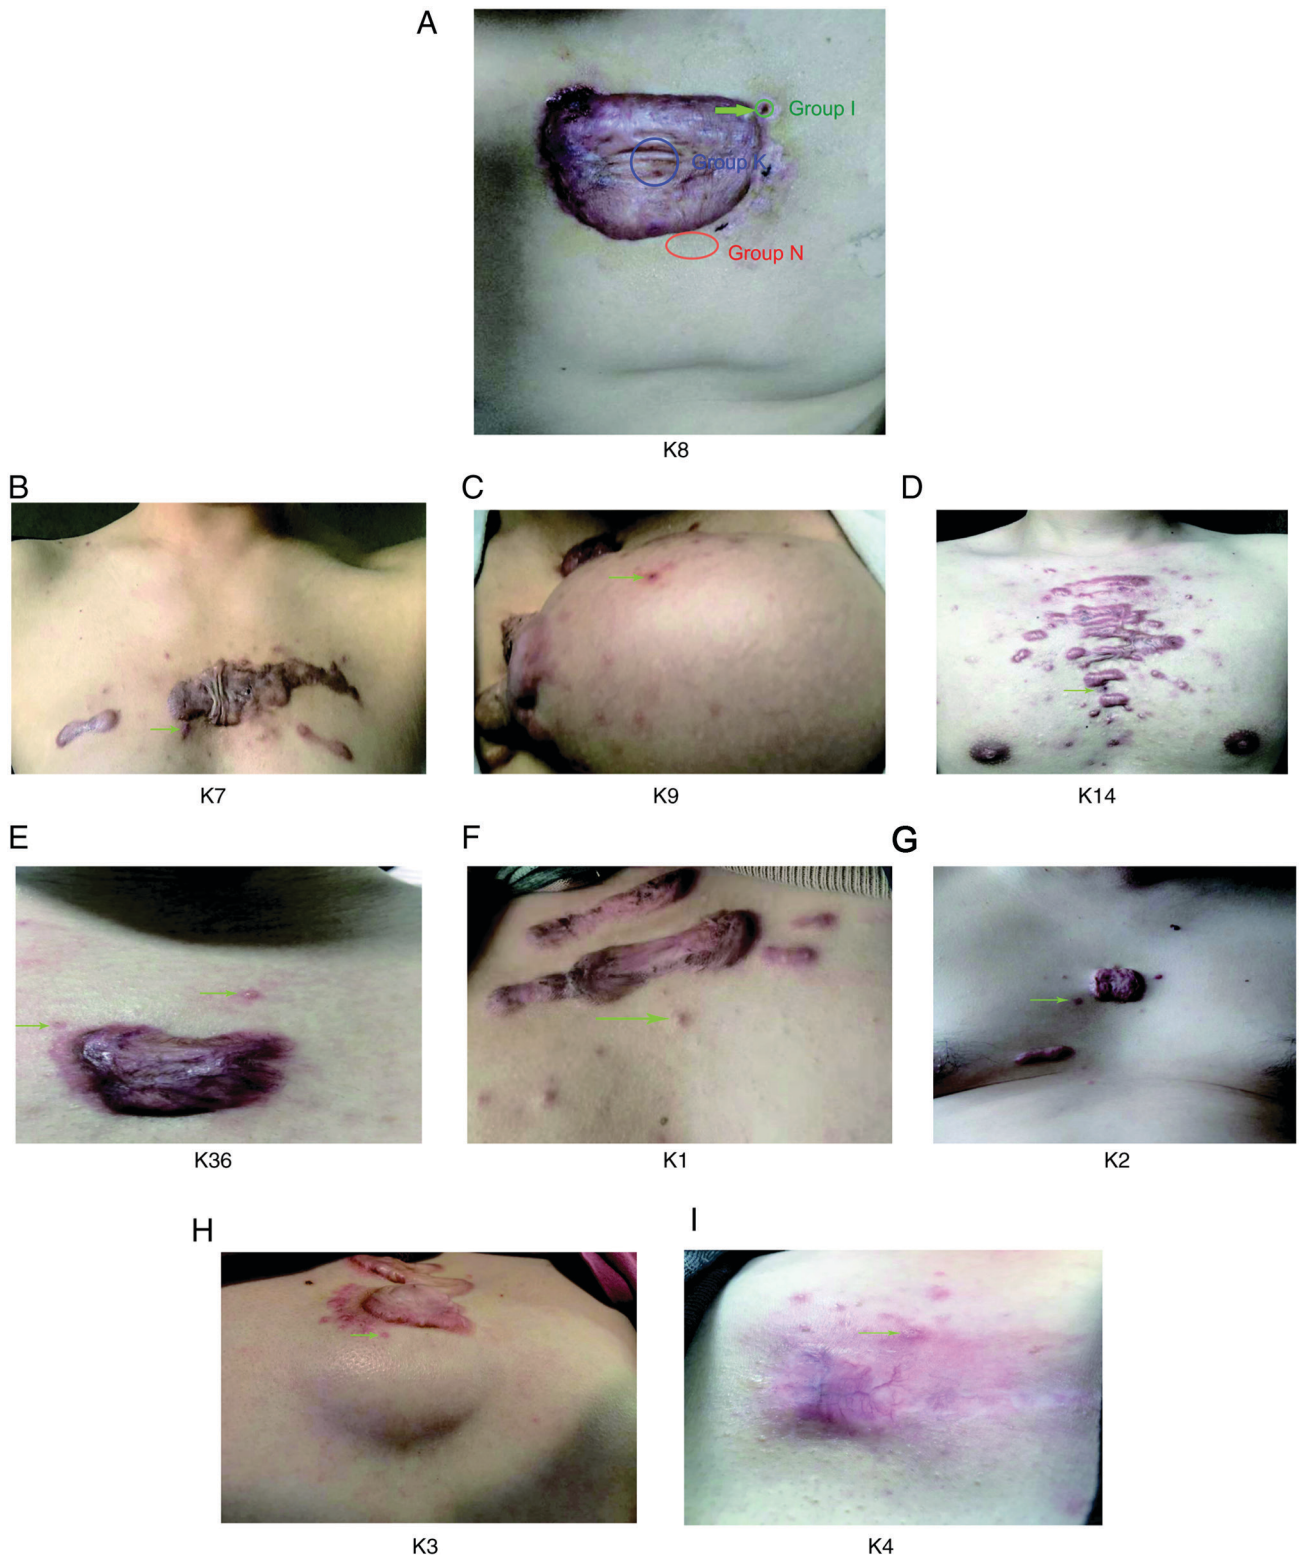

Figure S2. MCODE uses a vertex-weighting-based scheme to reveal local high-density areas in the graph. (A) MCODE was performed for groups I and N. Protein complexes are represented as graphs, using the spoke model. Vertices represent proteins and edges represent experimentally determined interactions. (B) MCODE was performed for groups I and K. (C) MCODE was performed for groups N and K.

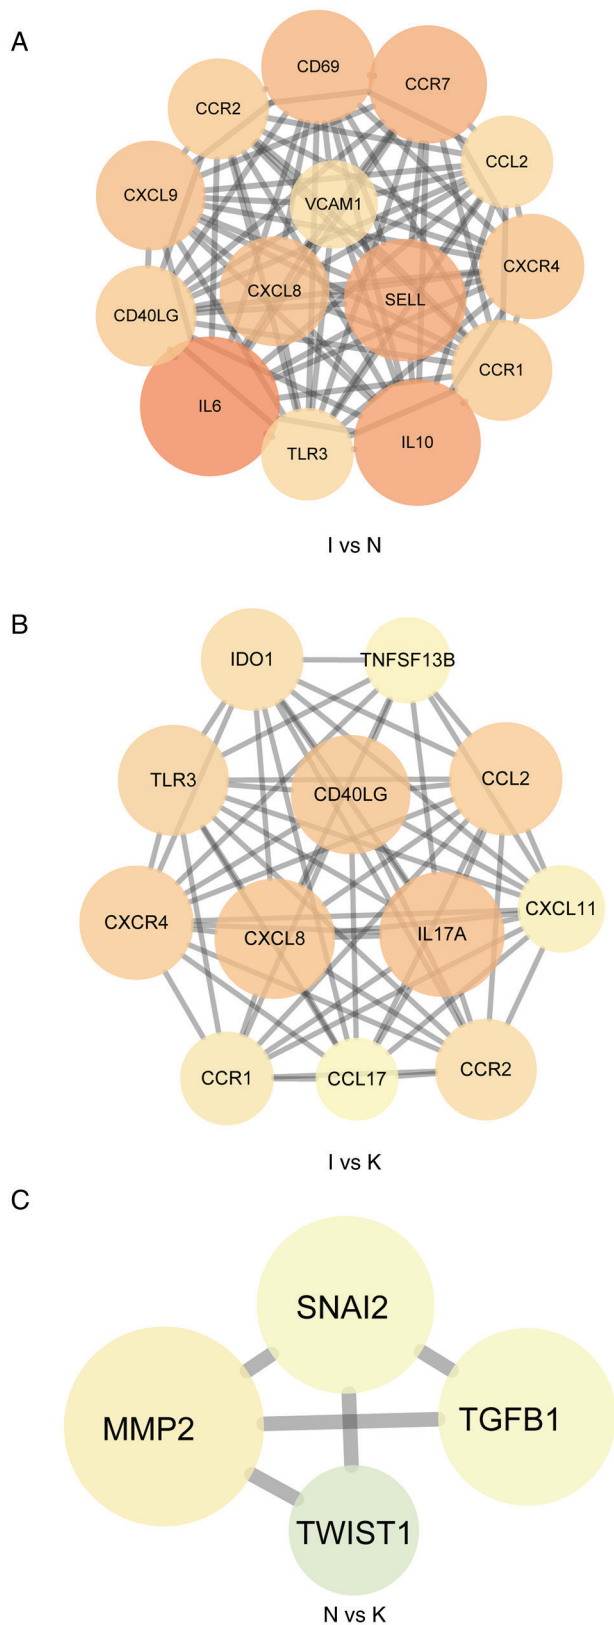

Figure S3. (A) GO enrichment analyses of biological processes of DEGs between groups N and K. (B) GO enrichment analyses of cellular components of DEGs between groups N and K. The cutoff for log2 fold change >1.5 or <-0.5 and P<0.05 were used as screening criteria. DEGs, differentially expressed genes; GO, Gene Ontology; BP, biological processes; CC, cellular components.

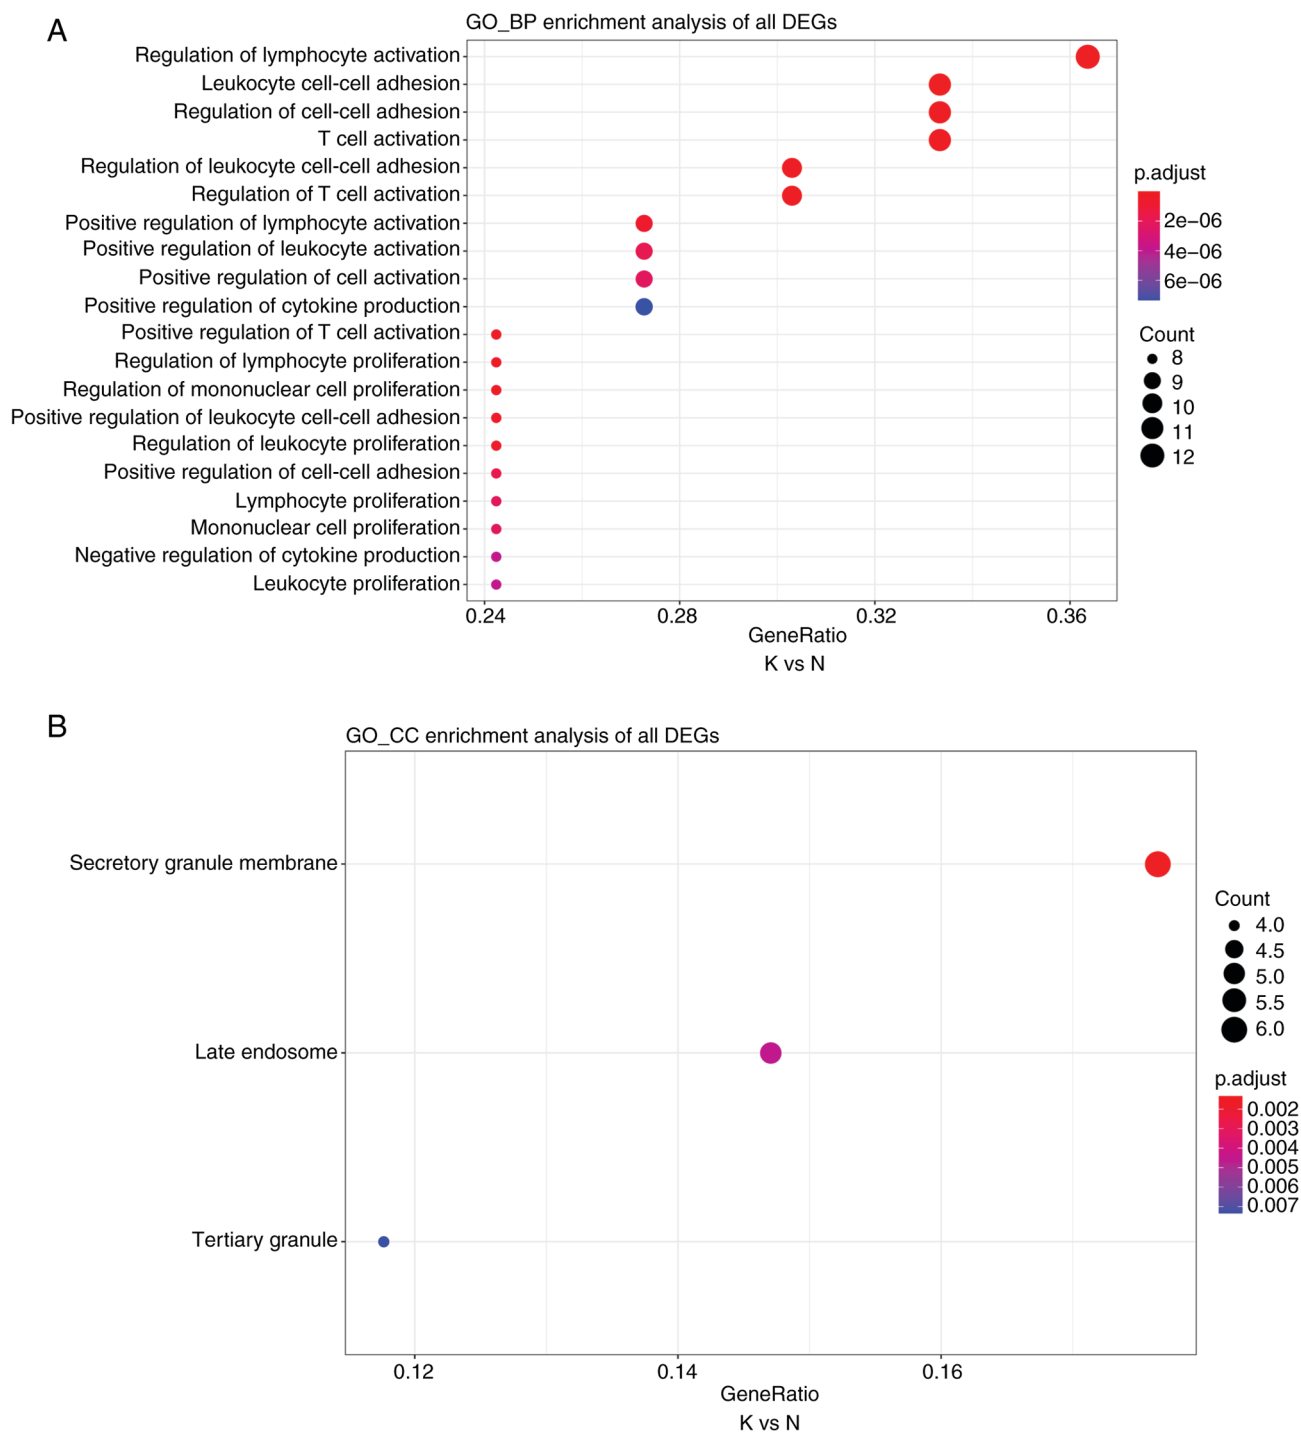

Supplement: Supplementary_Data.pdf [file Supplementary_Data.pdf]
